# Supplementary material
Source: PubMed Central journal article supplement (PMC4465073)

# Hyponatremic polydipsic versus Nonpolydipsic

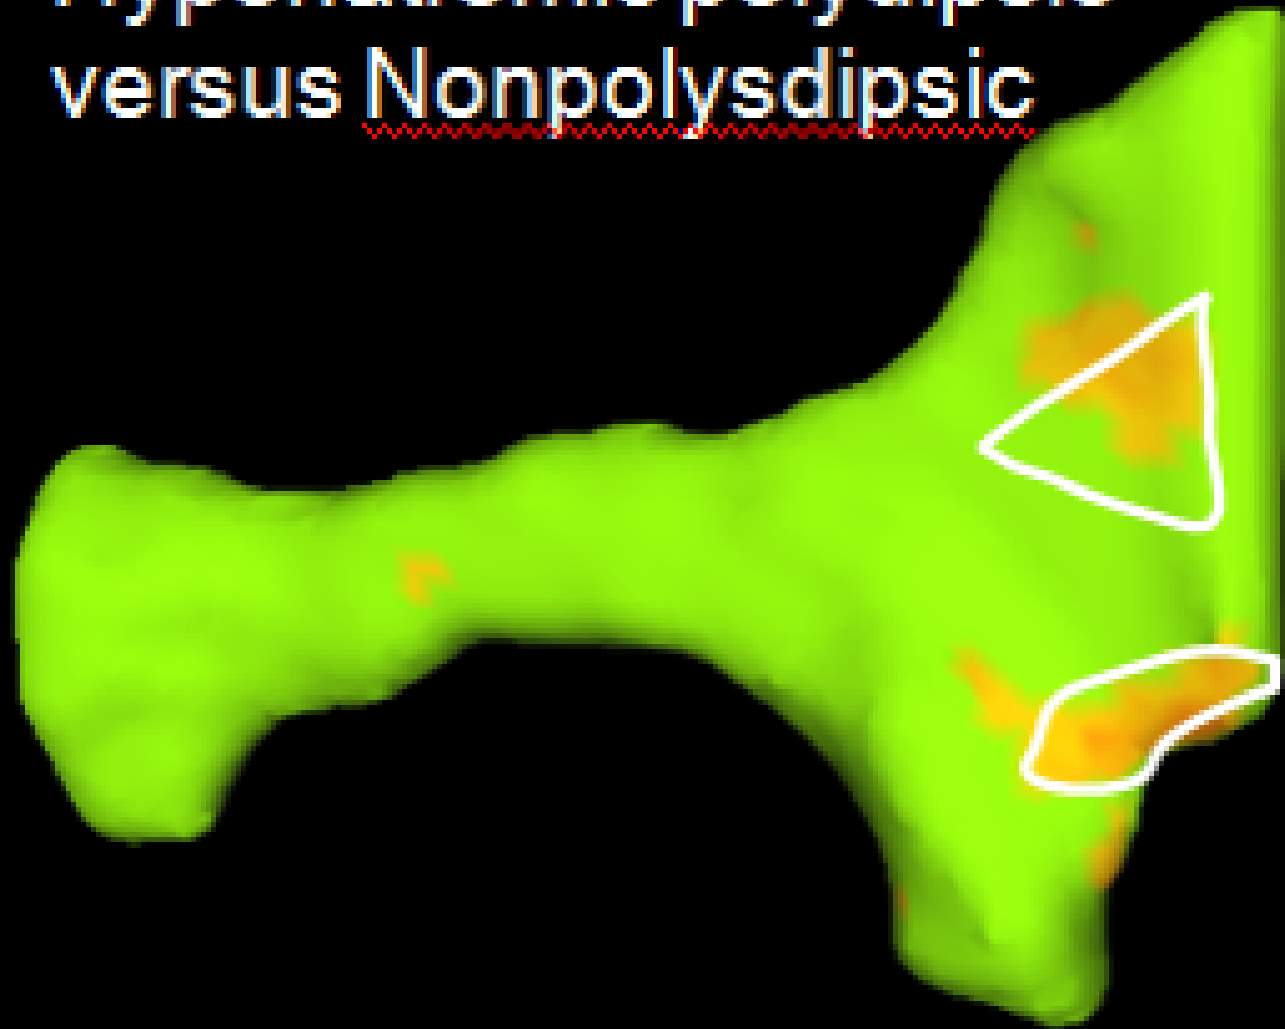

Supplement: NIHMS260007-supplement-03.pdf [file NIHMS260007-supplement-03.pdf]

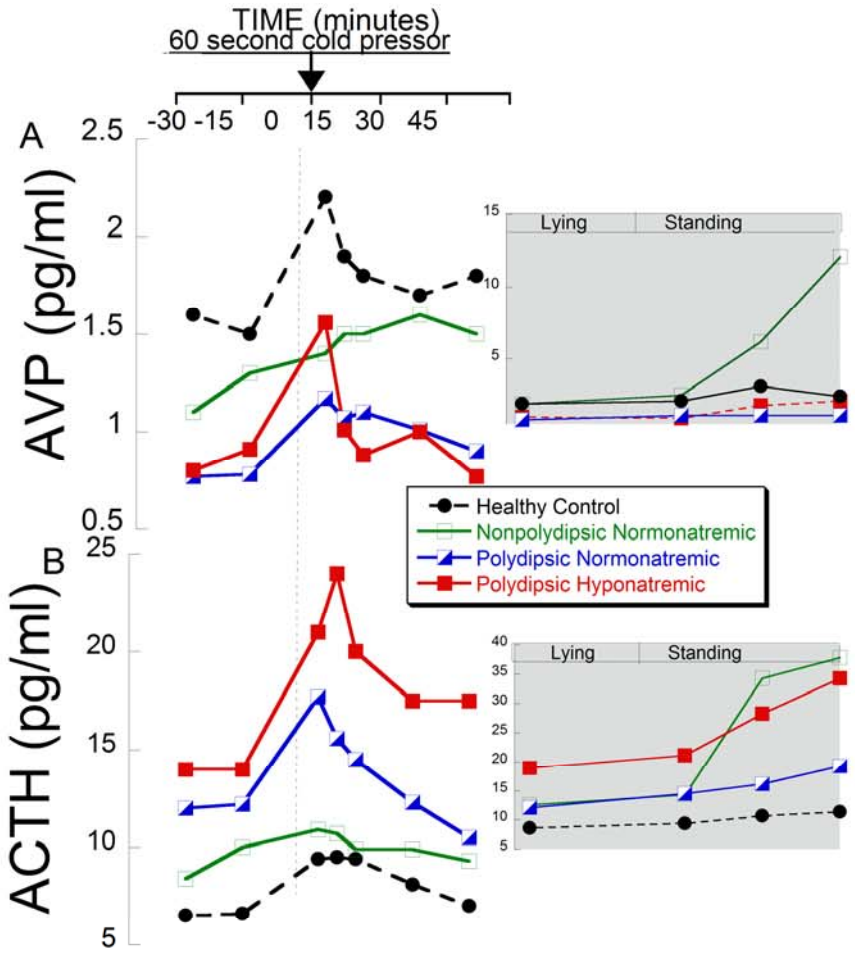

Supplement: NIHMS260007-supplement-04.pdf [file NIHMS260007-supplement-04.pdf]
